# Supplementary material for: Seeking Inspiration: Examining the Validity and Reliability of a New Smartphone Respiratory Therapy Exergame App
Source: MDPI journal article supplement (doi:10.3390/s21196472), 2021-09-28
Supplement: s1 [file s1]

## Supplementary Material

### SPSS Regression Model: Peak Inspiratory Flow – Pneumotachometer

Refer to section 4.2 of manuscript

**Variables Entered/Removed<sup>a</sup>**

| Model | Variables Entered                    | Variables Removed | Method |
|-------|--------------------------------------|-------------------|--------|
| 1     | FLOW_RATE <sup>b</sup> ,<br>DIAMETER | .                 | Enter  |

a. Dependent Variable: LN\_PIF\_PNEUMO

b. All requested variables entered.

**Model Summary**

| Model | R                 | R Square | Adjusted R Square | Std. Error of the Estimate | R Square Change | Change Statistics |     |     |               |
|-------|-------------------|----------|-------------------|----------------------------|-----------------|-------------------|-----|-----|---------------|
|       |                   |          |                   |                            |                 | F Change          | df1 | df2 | Sig. F Change |
| 1     | .929 <sup>a</sup> | .862     | .861              | .10118                     | .862            | 553.381           | 2   | 177 | <.001         |

a. Predictors: (Constant), FLOW\_RATE, DIAMETER

**ANOVA<sup>a</sup>**

| Model |            | Sum of Squares | df  | Mean Square | F       | Sig.               |
|-------|------------|----------------|-----|-------------|---------|--------------------|
| 1     | Regression | 11.330         | 2   | 5.665       | 553.381 | <.001 <sup>b</sup> |
|       | Residual   | 1.812          | 177 | .010        |         |                    |
|       | Total      | 13.142         | 179 |             |         |                    |

a. Dependent Variable: LN\_PIF\_PNEUMO

b. Predictors: (Constant), FLOW\_RATE, DIAMETER

**Coefficients<sup>a</sup>**

| Model |            | Unstandardized Coefficients |            | Standardized Coefficients | t       | Sig.  |
|-------|------------|-----------------------------|------------|---------------------------|---------|-------|
|       |            | B                           | Std. Error | Beta                      |         |       |
| 1     | (Constant) | -.003                       | .031       |                           | -.084   | .933  |
|       | DIAMETER   | .033                        | .001       | .689                      | 24.676  | <.001 |
|       | FLOW_RATE  | -.206                       | .009       | -.623                     | -22.313 | <.001 |

a. Dependent Variable: LN\_PIF\_PNEUMO

## Supplementary Material

### SPSS Regression Model: Sound level - Syringe-simulated inspirations

Refer to section 4.3 of manuscript

**Variables Entered/Removed<sup>a</sup>**

| Model | Variables Entered                          | Variables Removed | Method |
|-------|--------------------------------------------|-------------------|--------|
| 1     | FLOW_RATE, DIAMETER, DISTANCE <sup>b</sup> | .                 | Enter  |

a. Dependent Variable: VALUE

b. All requested variables entered.

**Model Summary<sup>b</sup>**

| Model | R                 | R Square | Adjusted R Square | Std. Error of the Estimate | Durbin-Watson |
|-------|-------------------|----------|-------------------|----------------------------|---------------|
| 1     | .864 <sup>a</sup> | .746     | .746              | 4.9433                     | .096          |

a. Predictors: (Constant), FLOW\_RATE, DIAMETER, DISTANCE

b. Dependent Variable: VALUE

**ANOVA<sup>a</sup>**

| Model |            | Sum of Squares | df  | Mean Square | F       | Sig.               |
|-------|------------|----------------|-----|-------------|---------|--------------------|
| 1     | Regression | 61230.793      | 3   | 20410.264   | 835.231 | <.001 <sup>b</sup> |
|       | Residual   | 20795.618      | 851 | 24.437      |         |                    |
|       | Total      | 82026.410      | 854 |             |         |                    |

a. Dependent Variable: VALUE

b. Predictors: (Constant), FLOW\_RATE, DIAMETER, DISTANCE

**Coefficients<sup>a</sup>**

| Model |            | Unstandardized Coefficients |            | Standardized Coefficients | t       | Sig.  | Correlations |         |       | Collinearity Statistics |       |
|-------|------------|-----------------------------|------------|---------------------------|---------|-------|--------------|---------|-------|-------------------------|-------|
|       |            | B                           | Std. Error | Beta                      |         |       | Zero-order   | Partial | Part  | Tolerance               | VIF   |
| 1     | (Constant) | 99.892                      | .754       |                           | 132.487 | .000  |              |         |       |                         |       |
|       | DISTANCE   | -.410                       | .010       | -.706                     | -40.746 | <.001 | -.671        | -.813   | -.703 | .992                    | 1.008 |
|       | DIAMETER   | -.854                       | .037       | -.398                     | -22.941 | <.001 | -.335        | -.618   | -.396 | .992                    | 1.008 |
|       | FLOW_RATE  | -4.484                      | .207       | -.374                     | -21.656 | <.001 | -.374        | -.596   | -.374 | 1.000                   | 1.000 |

a. Dependent Variable: VALUE

**Collinearity Diagnostics<sup>a</sup>**

| Model | Dimension | Eigenvalue | Condition Index | Variance Proportions |          |          |           |
|-------|-----------|------------|-----------------|----------------------|----------|----------|-----------|
|       |           |            |                 | (Constant)           | DISTANCE | DIAMETER | FLOW_RATE |
| 1     | 1         | 3.325      | 1.000           | .00                  | .03      | .01      | .01       |
|       | 2         | .526       | 2.514           | .00                  | .93      | .01      | .02       |
|       | 3         | .116       | 5.345           | .02                  | .00      | .23      | .76       |
|       | 4         | .033       | 10.070          | .98                  | .04      | .75      | .21       |

a. Dependent Variable: VALUE

**Residuals Statistics<sup>a</sup>**

|                      | Minimum  | Maximum | Mean   | Std.<br>Deviation | N   |
|----------------------|----------|---------|--------|-------------------|-----|
| Predicted Value      | 48.834   | 86.455  | 71.936 | 8.4675            | 855 |
| Residual             | -12.0705 | 11.1273 | .0000  | 4.9347            | 855 |
| Std. Predicted Value | -2.728   | 1.715   | .000   | 1.000             | 855 |
| Std. Residual        | -2.442   | 2.251   | .000   | .998              | 855 |

a. Dependent Variable: VALUE
